29. Deem S, Hedges RG, McKinney S, Polissar NL, Alberts MK, Swenson ER: Mechanisms of improvement in pulmonary gas exchange during isovolemic hemodilution. *J Appl Physiol* 1999; 87:132-41
30. Constable PD, Muir WW 3rd, Binkley PF: Hypertonic saline is a negative inotropic agent in normovolumic dogs. *Am J Physiol* 1994; 267:H667-77
31. Welte M, Goresch T, Frey L, Holzer K, Zwissler B, Messmer K: Hypertonic saline dextran does not increase cardiac contractile function during small volume resuscitation from hemorrhagic shock in anesthetized pigs. *Anesth Analg* 1995; 80:1099-107
32. Mazhar R, Samenesco A, Royston D, Rees A: Cardiopulmonary effects of 7.2% saline solution compared with gelatin infusion in the early postoperative period after coronary artery bypass grafting. *J Thorac Cardiovasc Surg* 1998; 115:178-89
33. Roch A, Blayac D, Ramiara P, Chetaille B, Marin V, Michelet P, Lambert D, Papazian L, Auffray JP, Carpentier JP: Comparison of lung injury after normal or small volume optimized resuscitation in a model of hemorrhagic shock. *Intensive Care Med* 2007; 33:1645-54
34. Roch A, Castanier M, Mardelle V, Trouse D, Marin V, Avaro JP, Tasei AM, Blayac D, Michelet P, Fusai T, Papazian L: Effect of hypertonic saline pre-treatment on ischemia-reperfusion lung injury in pig. *J Heart Lung Transplant* 2008; 27:1023-30
35. Moon PF, Kramer GC: Hypertonic saline-dextran resuscitation from hemorrhagic shock induces transient mixed acidosis. *Crit Care Med* 1995; 23:323-31

## ANESTHESIOLOGY REFLECTIONS

### Alvatunder Bottle by the Hisey Dental Manufacturing Company

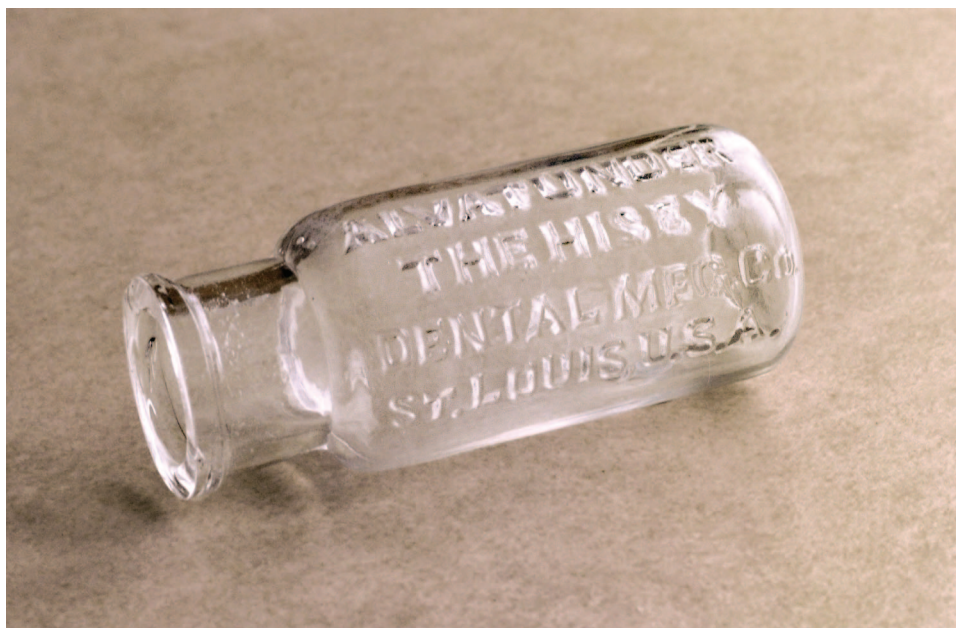

By the late 1890s, the Hisey Family of Toledo, Ohio, had popularized the use of Alvatunder, their proprietary local anesthetic mixture. According to the manual titled *The Newer Remedies*, Alvatunder was compounded from “1 gm. of cocaine hydrochlorid[e], 3 drops of liquefied phenol, 3 drops decolorized tinctur[e], of iodine, 10 grammes glycerin and water sufficient to make 100 gms.” Eventually mass-producing their bottles of Alvatunder from St. Louis (above), the Hiseys advertised in a manner that convinced New York dentist S. J. Bartlett to exaggerate that Alvatunder had “no poisonous effects of cocaine, no sloughing of gums, no swelling of jaw, no danger from injection . . . any amount can be used.” (Copyright © the American Society of Anesthesiologists, Inc. This image also appears in the *Anesthesiology Reflections* online collection available at [www.anesthesiology.org](http://www.anesthesiology.org).)

George S. Bause, M.D., M.P.H., Honorary Curator, ASA's Wood Library-Museum of Anesthesiology, Park Ridge, Illinois, and Clinical Associate Professor, Case Western Reserve University, Cleveland, Ohio. [UJYC@aol.com](mailto:UJYC@aol.com).
